# Supplementary material for: Behaviour of DFT-based approaches to the spin–orbit term of zero-field splitting tensors: a case study of metallocomplexes, MIII(acac)3 (M = V, Cr, Mn, Fe and Mo)
Source: Royal Society of Chemistry journal article supplement (doi:10.1039/c7cp05533a), 2017-01-01
Supplement: c7cp05533a1.pdf [file c7cp05533a1.pdf]

## Electronic Supplementary Information

### Contents

1. Cartesian coordinates of  $M(\text{acac})_3$  in the  $\mathbf{D}^{\text{SO}}$ (hybrid CASSCF/MRMP2) principal axes coordinate
2. CASSCF active space of  $M(\text{acac})_3$  ( $M = \text{Cr, Mn, Fe and Mo}$ )
3. Electronic states of  $M(\text{acac})_3$  calculated by using the CASSCF and MRMP2 levels of theory
4. Spin configuration-based analysis of the  $\mathbf{D}^{\text{SO}}$ (NOB-PK) tensors

1. Cartesian coordinates of  $M(acac)_3$  in the  $D^{SO}$ (hybrid CASSCF/MRMP2) principal axes coordinate

In the present study, geometry optimisations were carried out at the UB3LYP/6-31G\* level of theory without symmetry constraints by using Gaussian 09. Cartesian coordinates are rotated from the Standard orientations obtained from the geometry optimisations to the principal axes coordinates of the theoretical  $D^{SO}$  tensors calculated at the hybrid CASSCF/MRMP2 method.

Cartesian coordinates of  $V(acac)_3$

|   |           |           |           |
|---|-----------|-----------|-----------|
| V | -0.000002 | 0.000006  | 0.073106  |
| O | -1.162816 | -0.767908 | -1.352432 |
| O | 1.162819  | 0.767862  | -1.352460 |
| O | 1.239488  | 0.738243  | 1.489444  |
| O | 1.067276  | -1.664507 | 0.168873  |
| O | -1.239518 | -0.738173 | 1.489466  |
| O | -1.067284 | 1.664524  | 0.168814  |
| C | -2.085084 | -1.415374 | -3.426473 |
| C | -1.028918 | -0.691874 | -2.622204 |
| C | 0.000034  | -0.000097 | -3.281674 |
| C | 1.028961  | 0.691734  | -2.622230 |
| C | 2.085149  | 1.415179  | -3.426524 |
| C | 3.126220  | 1.179873  | 2.837744  |
| C | 2.363994  | 0.292054  | 1.879372  |
| C | 2.904035  | -0.953834 | 1.497812  |
| C | 2.223084  | -1.868587 | 0.689796  |
| C | 2.828099  | -3.221194 | 0.395067  |
| C | -3.126260 | -1.179743 | 2.837786  |
| C | -2.364022 | -0.291963 | 1.879387  |
| C | -2.904056 | 0.953914  | 1.497789  |
| C | -2.223094 | 1.868630  | 0.689739  |
| C | -2.828105 | 3.221226  | 0.394963  |
| H | -2.085994 | -2.476082 | -3.150880 |
| H | -3.073836 | -1.017305 | -3.171102 |
| H | -1.928843 | -1.324000 | -4.504204 |
| H | 0.000051  | -0.000136 | -4.365179 |
| H | 3.073897  | 1.017141  | -3.171103 |
| H | 1.928946  | 1.323723  | -4.504253 |
| H | 2.086040  | 2.475910  | -3.151006 |
| H | 2.512188  | 1.366036  | 3.726229  |
| H | 4.080505  | 0.744879  | 3.145042  |

|   |           |           |           |
|---|-----------|-----------|-----------|
| H | 3.307935  | 2.151104  | 2.363898  |
| H | 3.867429  | -1.241548 | 1.901278  |
| H | 2.157017  | -4.006378 | 0.761805  |
| H | 2.913485  | -3.353957 | -0.689598 |
| H | 3.812839  | -3.347622 | 0.851741  |
| H | -2.512228 | -1.365899 | 3.726261  |
| H | -4.080534 | -0.744721 | 3.145092  |
| H | -3.308001 | -2.150979 | 2.363957  |
| H | -3.867450 | 1.241648  | 1.901247  |
| H | -2.157027 | 4.006423  | 0.761678  |
| H | -2.913478 | 3.353946  | -0.689706 |
| H | -3.812850 | 3.347672  | 0.851634  |

Cartesian coordinates of Cr(acac)<sub>3</sub>

|    |           |           |           |
|----|-----------|-----------|-----------|
| Cr | 0.000383  | -0.000126 | -0.001304 |
| O  | 1.350306  | -0.882077 | -1.135762 |
| O  | 1.426009  | 0.752371  | 1.133791  |
| O  | -1.359538 | 0.863054  | 1.135251  |
| O  | 0.085695  | 1.605152  | -1.142967 |
| O  | -1.435357 | -0.731744 | -1.137123 |
| O  | -0.064556 | -1.606777 | 1.139889  |
| C  | 3.391058  | -1.621715 | -2.051007 |
| C  | 2.620527  | -0.845721 | -1.006828 |
| C  | 3.313429  | -0.158416 | 0.002431  |
| C  | 2.687249  | 0.593577  | 1.008983  |
| C  | 3.525167  | 1.293763  | 2.054768  |
| C  | -2.871074 | 2.416408  | 2.057356  |
| C  | -1.853174 | 2.034038  | 1.006678  |
| C  | -1.521350 | 2.946486  | -0.007082 |
| C  | -0.583279 | 2.686045  | -1.018432 |
| C  | -0.301910 | 3.735372  | -2.070036 |
| C  | -3.090148 | -2.133840 | -2.055534 |
| C  | -2.038671 | -1.849941 | -1.006708 |
| C  | -1.794367 | -2.789026 | 0.007540  |
| C  | -0.834365 | -2.618616 | 1.017491  |
| C  | -0.653855 | -3.688778 | 2.070225  |
| H  | 3.146318  | -1.231003 | -3.045189 |
| H  | 3.074883  | -2.670820 | -2.031649 |
| H  | 4.471812  | -1.568496 | -1.899315 |
| H  | 4.395410  | -0.210910 | 0.003911  |

|   |           |           |           |
|---|-----------|-----------|-----------|
| H | 3.313693  | 2.368791  | 2.030182  |
| H | 4.596341  | 1.134428  | 1.909453  |
| H | 3.237947  | 0.932833  | 3.048815  |
| H | -3.687584 | 1.685614  | 2.055898  |
| H | -3.282136 | 3.416393  | 1.898965  |
| H | -2.402404 | 2.372091  | 3.047060  |
| H | -2.018049 | 3.909075  | -0.008551 |
| H | -0.509500 | 3.317624  | -3.061596 |
| H | 0.762332  | 3.996123  | -2.048054 |
| H | -0.896890 | 4.640958  | -1.928888 |
| H | -3.836070 | -1.331088 | -2.049325 |
| H | -3.591122 | -3.092201 | -1.898727 |
| H | -2.622175 | -2.129451 | -3.046506 |
| H | -2.380882 | -3.699681 | 0.010508  |
| H | -0.828301 | -3.253769 | 3.060811  |
| H | 0.382689  | -4.044120 | 2.053795  |
| H | -1.327419 | -4.537012 | 1.925969  |

Cartesian coordinates of Mn(acac)<sub>3</sub>

|    |           |           |           |
|----|-----------|-----------|-----------|
| Mn | 0.052604  | -0.000761 | -0.000322 |
| O  | -1.315257 | -1.352176 | 0.070354  |
| O  | 0.019587  | -0.178836 | -2.144068 |
| O  | 1.436407  | 1.357348  | -0.088150 |
| O  | 1.408432  | -1.386868 | 0.087783  |
| O  | 0.023573  | 0.177693  | 2.143521  |
| O  | -1.287129 | 1.378692  | -0.070864 |
| C  | -2.998105 | -2.922221 | -0.399686 |
| C  | -1.949826 | -1.945374 | -0.883250 |
| C  | -1.748320 | -1.762820 | -2.248616 |
| C  | -0.776317 | -0.894654 | -2.811664 |
| C  | -0.660958 | -0.806042 | -4.321786 |
| C  | 3.502490  | 2.480355  | -0.176191 |
| C  | 2.706318  | 1.200943  | -0.082745 |
| C  | 3.362705  | -0.034446 | 0.001149  |
| C  | 2.681254  | -1.256294 | 0.083888  |
| C  | 3.451158  | -2.551664 | 0.177565  |
| C  | -0.643176 | 0.819242  | 4.321314  |
| C  | -0.756941 | 0.910165  | 2.811212  |
| C  | -1.710461 | 1.798677  | 2.248295  |
| C  | -1.908513 | 1.985336  | 0.882960  |

|   |           |           |           |
|---|-----------|-----------|-----------|
| C | -2.935880 | 2.984397  | 0.399911  |
| H | -2.523348 | -3.680271 | 0.233561  |
| H | -3.728506 | -2.394669 | 0.224360  |
| H | -3.518677 | -3.416057 | -1.223850 |
| H | -2.370746 | -2.334675 | -2.926607 |
| H | 0.361035  | -1.063753 | -4.621688 |
| H | -1.364305 | -1.460489 | -4.843306 |
| H | -0.834902 | 0.229958  | -4.634045 |
| H | 3.227808  | 3.139780  | 0.654575  |
| H | 4.580317  | 2.303105  | -0.156533 |
| H | 3.237946  | 3.002294  | -1.102633 |
| H | 4.445424  | -0.045439 | 0.001753  |
| H | 3.174244  | -3.069092 | 1.102914  |
| H | 3.164828  | -3.204531 | -0.654459 |
| H | 4.532391  | -2.396277 | 0.160152  |
| H | 0.384329  | 1.054370  | 4.620917  |
| H | -1.331806 | 1.489115  | 4.842882  |
| H | -0.839868 | -0.212622 | 4.633782  |
| H | -2.320311 | 2.383835  | 2.926370  |
| H | -2.445374 | 3.732012  | -0.233739 |
| H | -3.677955 | 2.472674  | -0.223553 |
| H | -3.445078 | 3.489346  | 1.224441  |

Cartesian coordinates of Fe(acac)<sub>3</sub>

|    |           |           |           |
|----|-----------|-----------|-----------|
| Fe | 0.017436  | 0.000119  | 0.000011  |
| O  | 1.382739  | 0.898529  | 1.161185  |
| O  | 0.094752  | 1.637119  | -1.158843 |
| O  | -1.439565 | -0.753467 | -1.157665 |
| O  | -1.445558 | 0.743423  | 1.156783  |
| O  | 0.105442  | -1.636350 | 1.158858  |
| O  | 1.389796  | -0.888657 | -1.160277 |
| C  | 2.887005  | 2.413075  | 2.167944  |
| C  | 1.914483  | 2.054783  | 1.066417  |
| C  | 1.657171  | 2.970917  | 0.034060  |
| C  | 0.769373  | 2.711711  | -1.022753 |
| C  | 0.562299  | 3.748813  | -2.104173 |
| C  | -3.501916 | -1.358207 | -2.133289 |
| C  | -2.707931 | -0.673493 | -1.043038 |
| C  | -3.377276 | -0.012025 | -0.000922 |
| C  | -2.713254 | 0.654319  | 1.041498  |

|   |           |           |           |
|---|-----------|-----------|-----------|
| C | -3.512714 | 1.333304  | 2.131330  |
| C | 0.587013  | -3.744833 | 2.104323  |
| C | 0.787531  | -2.706256 | 1.023080  |
| C | 1.677779  | -2.959223 | -0.033182 |
| C | 1.929457  | -2.041217 | -1.065265 |
| C | 2.905241  | -2.392614 | -2.166129 |
| H | 2.371192  | 2.364318  | 3.133625  |
| H | 3.692233  | 1.670268  | 2.197014  |
| H | 3.319850  | 3.408503  | 2.040424  |
| H | 2.173300  | 3.923275  | 0.050702  |
| H | -0.498931 | 4.018318  | -2.150256 |
| H | 1.156341  | 4.651506  | -1.940744 |
| H | 0.825081  | 3.314178  | -3.075265 |
| H | -3.221657 | -2.416702 | -2.176474 |
| H | -4.581271 | -1.276724 | -1.982258 |
| H | -3.238725 | -0.917225 | -3.101489 |
| H | -4.460620 | -0.015946 | -0.001192 |
| H | -3.246661 | 0.894421  | 3.099702  |
| H | -3.240300 | 2.393845  | 2.174464  |
| H | -4.591377 | 1.243832  | 1.979874  |
| H | -0.472372 | -4.021587 | 2.149851  |
| H | 1.187300  | -4.643427 | 1.941131  |
| H | 0.846330  | -3.308489 | 3.075582  |
| H | 2.200514  | -3.907974 | -0.049555 |
| H | 2.389812  | -2.347288 | -3.132181 |
| H | 3.705319  | -1.644238 | -2.194500 |
| H | 3.344889  | -3.385036 | -2.038435 |

Cartesian coordinates of Mo(acac)<sub>3</sub>

|    |           |           |           |
|----|-----------|-----------|-----------|
| Mo | -0.000085 | 0.000036  | 0.000685  |
| O  | 1.711859  | 0.358510  | -1.167105 |
| O  | 1.232676  | -1.243908 | 1.165236  |
| O  | -1.690026 | -0.452216 | 1.168284  |
| O  | -0.548510 | -1.654263 | -1.175846 |
| O  | -1.162006 | 1.309684  | -1.164898 |
| O  | 0.457753  | 1.681950  | 1.176581  |
| C  | 3.890400  | 0.337367  | -2.064695 |
| C  | 2.892106  | -0.116470 | -1.022788 |
| C  | 3.301492  | -0.993102 | -0.003442 |
| C  | 2.478691  | -1.499013 | 1.017509  |

|   |           |           |           |
|---|-----------|-----------|-----------|
| C | 3.063163  | -2.430727 | 2.056017  |
| C | -3.630320 | -1.450187 | 2.058249  |
| C | -2.534756 | -1.402414 | 1.016284  |
| C | -2.511317 | -2.360878 | -0.011298 |
| C | -1.550197 | -2.439123 | -1.033645 |
| C | -1.659125 | -3.524798 | -2.081250 |
| C | -2.231192 | 3.212535  | -2.052674 |
| C | -1.341253 | 2.568346  | -1.012814 |
| C | -0.790103 | 3.354750  | 0.013324  |
| C | 0.055821  | 2.889396  | 1.034569  |
| C | 0.565829  | 3.855078  | 2.081198  |
| H | 3.533610  | 0.046507  | -3.059447 |
| H | 3.955391  | 1.431438  | -2.055336 |
| H | 4.886240  | -0.082797 | -1.903906 |
| H | 4.339106  | -1.305518 | -0.004842 |
| H | 2.520127  | -3.382716 | 2.038876  |
| H | 4.127269  | -2.622077 | 1.897481  |
| H | 2.919580  | -1.998324 | 3.052848  |
| H | -4.179667 | -0.501728 | 2.053608  |
| H | -4.331595 | -2.271783 | 1.893207  |
| H | -3.180881 | -1.554811 | 3.052430  |
| H | -3.300978 | -3.102998 | -0.015070 |
| H | -1.725695 | -3.065192 | -3.074039 |
| H | -0.747941 | -4.133944 | -2.071092 |
| H | -2.525417 | -4.172691 | -1.926858 |
| H | -3.213598 | 2.726512  | -2.043235 |
| H | -2.360224 | 4.285244  | -1.889274 |
| H | -1.802821 | 3.048937  | -3.048176 |
| H | -1.038193 | 4.409606  | 0.017130  |
| H | 0.252702  | 3.512033  | 3.074003  |
| H | 1.661853  | 3.855645  | 2.073834  |
| H | 0.205278  | 4.874536  | 1.923814  |

2. CASSCF active space of  $M(\text{acac})_3$  ( $M = \text{Cr}, \text{Mn}, \text{Fe}$  and  $\text{Mo}$ )

Note that the CASSCF active space of  $\text{V}(\text{acac})_3$  is given as Fig. 1 in the text.

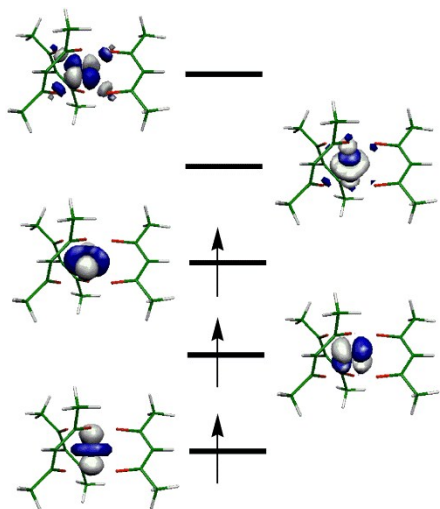

**Fig. S1** CASSCF active space and electron occupancies in the main configuration of the ground state of  $\text{Cr}(\text{acac})_3$ .

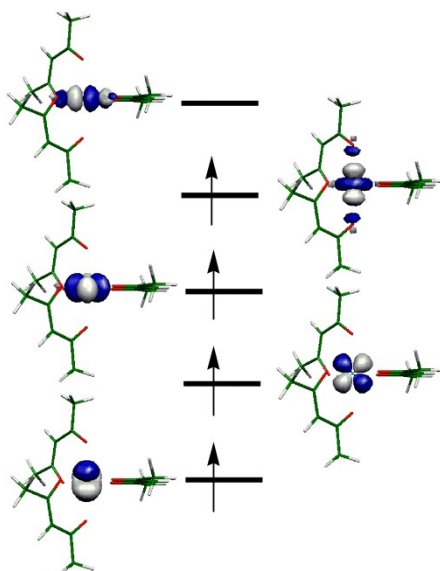

**Fig. S2** CASSCF active space and electron occupancies in the main configuration of the ground state of  $\text{Mn}(\text{acac})_3$ .



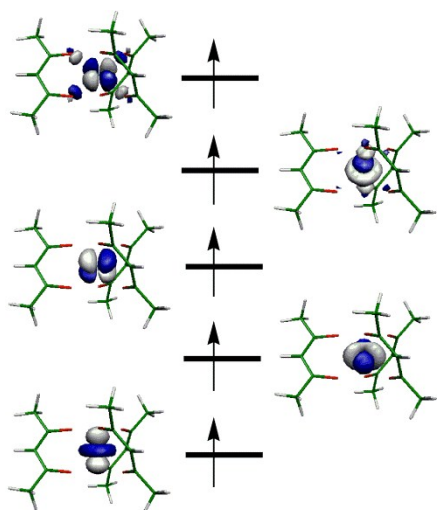

**Fig. S3** CASSCF active space and electron occupancies in the main configuration of the ground state of Fe(acac)<sub>3</sub>.

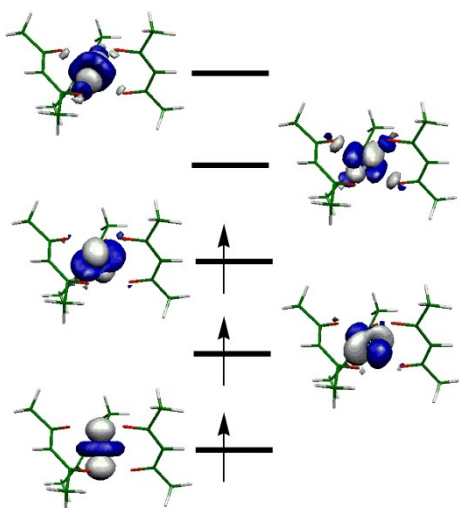

**Fig. S4** CASSCF active space and electron occupancies in the main configuration of the ground state of Mo(acac)<sub>3</sub>.

3. Electronic states of  $M(\text{acac})_3$  calculated by using the CASSCF and MRMP2 levels of theory

Table S1 Electronic states of  $V(\text{acac})_3$ .

| State             | Main Configurations ( $ C  > 0.3$ ) <sup>a</sup> | $\Delta E_{\text{MRMP2}}$<br>/cm <sup>-1</sup> | SOCC <sup>b</sup><br>/cm <sup>-1</sup> | $D^{\text{SO}}_{ii}$ /cm <sup>-1</sup> |          |         |
|-------------------|--------------------------------------------------|------------------------------------------------|----------------------------------------|----------------------------------------|----------|---------|
|                   |                                                  |                                                |                                        | $i = x$                                | $i = y$  | $i = z$ |
| 1 <sup>3</sup> A  | -0.97 (uu000)                                    |                                                |                                        |                                        |          |         |
| 2 <sup>3</sup> A  | -0.97 (u0u00)                                    | 997                                            | 118.78                                 | -1.8658                                | -12.2832 | 0.0000  |
| 3 <sup>3</sup> A  | -0.98 (0uu00)                                    | 1 643                                          | 133.44                                 | -9.2658                                | -1.5724  | 0.0000  |
| 1 <sup>1</sup> A  | 0.77 (20000) -0.58 (02000)                       | 10 218                                         | 26.1                                   | 0.0000                                 | 0.0000   | 0.0667  |
| 2 <sup>1</sup> A  | 0.74 (00200) -0.55 (02000)<br>-0.32 (20000)      | 11 928                                         | 147.73                                 | 0.0000                                 | 0.0000   | 1.8297  |
| 3 <sup>1</sup> A  | -0.97 (ud000)                                    | 12 373                                         | 2.42                                   | 0.0000                                 | 0.0000   | 0.0005  |
| 4 <sup>1</sup> A  | 0.81 (u0d00) +0.55 (0ud00)                       | 13 444                                         | 103.22                                 | 0.0341                                 | 0.7583   | 0.0000  |
| 4 <sup>3</sup> A  | 0.75 (u00u0) -0.51 (0u0u0)<br>-0.43 (00u0u)      | 13 820                                         | 183.82                                 | -0.6310                                | -1.8140  | 0.0000  |
| 5 <sup>1</sup> A  | -0.81 (0ud00) +0.57 (u0d00)                      | 14 385                                         | 136.89                                 | 1.2179                                 | 0.0847   | 0.0000  |
| 5 <sup>3</sup> A  | -0.75 (u000u) +0.49 (00uu0)<br>-0.45 (0u00u)     | 14 503                                         | 143.65                                 | 0.0000                                 | 0.0000   | -1.4227 |
| 6 <sup>3</sup> A  | 0.71 (0u00u) +0.70 (00uu0)                       | 16 548                                         | 102.61                                 | 0.0000                                 | 0.0000   | -0.6362 |
| 6 <sup>1</sup> A  | 0.60 (00200) +0.54 (02000)<br>+0.45 (20000)      | 24 471                                         | 121.90                                 | 0.0000                                 | 0.0000   | 0.6072  |
| 7 <sup>3</sup> A  | -0.65 (u000u) +0.52 (0u00u)<br>-0.51 (00uu0)     | 26 220                                         | 4.20                                   | 0.0000                                 | 0.0000   | -0.0007 |
| 8 <sup>3</sup> A  | -0.75 (0u0u0) -0.60 (u00u0)                      | 26 356                                         | 55.05                                  | -0.0738                                | -0.0412  | 0.0000  |
| 9 <sup>3</sup> A  | -0.83 (00u0u) -0.33 (000uu)<br>+0.33 (0u0u0)     | 27 957                                         | 39.80                                  | -0.0229                                | -0.0337  | 0.0000  |
| 7 <sup>1</sup> A  | 0.79 (u000d) -0.49 (00ud0)<br>+0.31 (0u00d)      | 29 254                                         | 99.31                                  | 0.0000                                 | 0.0000   | 0.3371  |
| 8 <sup>1</sup> A  | -0.83 (u00d0) +0.44 (0u0d0)                      | 29 257                                         | 155.40                                 | 0.1252                                 | 0.7002   | 0.0000  |
| 9 <sup>1</sup> A  | 0.73 (0u00d) +0.65 (00ud0)                       | 30 576                                         | 76.70                                  | 0.0000                                 | 0.0000   | 0.1924  |
| 10 <sup>1</sup> A | 0.59 (u000d) -0.58 (0u00d)<br>+0.56 (00ud0)      | 33 381                                         | 15.26                                  | 0.0000                                 | 0.0000   | 0.0070  |
| 11 <sup>1</sup> A | 0.87 (0u0d0) +0.49 (u00d0)                       | 34 011                                         | 107.80                                 | 0.2880                                 | 0.0537   | 0.0000  |
| 12 <sup>1</sup> A | 0.96 (00u0d)                                     | 34 795                                         | 71.36                                  | 0.0514                                 | 0.0949   | 0.0000  |
| 10 <sup>3</sup> A | 0.94 (000uu)                                     | 34 809                                         | 13.68                                  | -0.0041                                | -0.0013  | 0.0000  |
| 13 <sup>1</sup> A | -0.73 (00020) +0.68 (00002)                      | 48 887                                         | 16.83                                  | 0.0000                                 | 0.0000   | 0.0058  |
| 14 <sup>1</sup> A | -0.99 (000ud)                                    | 49 055                                         | 25.86                                  | 0.0083                                 | 0.0053   | 0.0000  |
| 15 <sup>1</sup> A | 0.69 (00002) +0.62 (00020)                       | 63 098                                         | 7.25                                   | 0.0000                                 | 0.0000   | 0.0008  |

<sup>a</sup> 2, 0, u, and d stand for the doubly occupied, unoccupied, spin up ( $\alpha$ ), and spin down ( $\beta$ ), respectively. <sup>b</sup> Spin-orbit coupling constants. <sup>c</sup> Contributions to the  $\mathbf{D}^{\text{SO}}$  principal values.

Table S2 Electronic states of Cr(acac)<sub>3</sub>

| State             | Main Configurations ( $ C  > 0.3$ ) <sup>a</sup>                                          | $\Delta E_{\text{MRMP2}}$<br>/cm <sup>-1</sup> | SOCC <sup>b</sup><br>/cm <sup>-1</sup> | $D_{ii}^{\text{SO}}/\text{cm}^{-1}$ |         |         |
|-------------------|-------------------------------------------------------------------------------------------|------------------------------------------------|----------------------------------------|-------------------------------------|---------|---------|
|                   |                                                                                           |                                                |                                        | $i = x$                             | $i = y$ | $i = z$ |
| 1 <sup>4</sup> A  | 1.00 (uuu00)                                                                              |                                                |                                        |                                     |         |         |
| 2 <sup>4</sup> A  | -0.68 (0uu0u) -0.48 (uu00u)<br>-0.47 (u0uu0)                                              | 15 372                                         | 244.59                                 | -0.1388                             | -1.5908 | 0.0000  |
| 3 <sup>4</sup> A  | -0.68 (0uuu0) +0.48 (uu0u0)<br>-0.48 (u0u0u)                                              | 15 398                                         | 244.62                                 | -1.5887                             | -0.1385 | 0.0000  |
| 4 <sup>4</sup> A  | 0.71 (u0uu0) -0.71 (uu00u)                                                                | 16 324                                         | 254.82                                 | 0.0000                              | 0.0000  | -1.7678 |
| 1 <sup>2</sup> A  | -0.60 (20u00) +0.57 (02u00)<br>-0.32 (u2000) +0.32 (u0200)                                | 17 836                                         | 8.51                                   | 0.0001                              | 0.0020  | 0.0000  |
| 2 <sup>2</sup> A  | -0.60 (2u000) -0.57 (0u200)<br>-0.39 (uud00)                                              | 17 839                                         | 8.57                                   | 0.0020                              | 0.0001  | 0.0000  |
| 3 <sup>2</sup> A  | -0.85 (udu00) +0.49 (uud00)                                                               | 18 747                                         | 0.08                                   | 0.0000                              | 0.0000  | 0.0000  |
| 4 <sup>2</sup> A  | 0.61 (u2000) -0.61 (u0200)<br>-0.32 (20u00) +0.31 (02u00)                                 | 19 019                                         | 0.64                                   | 0.0000                              | 0.0000  | 0.0000  |
| 5 <sup>2</sup> A  | -0.75 (uud00) -0.43 (udu00)<br>+0.32 (2u000) +0.31 (0u200)                                | 19 033                                         | 0.52                                   | 0.0000                              | 0.0000  | 0.0000  |
| 6 <sup>2</sup> A  | 0.63 (0u200) -0.58 (2u000)                                                                | 22 594                                         | 275.17                                 | 1.6690                              | 0.0067  | 0.0000  |
| 7 <sup>2</sup> A  | -0.63 (02u00) -0.58 (20u00)                                                               | 22 776                                         | 275.23                                 | 0.0067                              | 1.6563  | 0.0000  |
| 5 <sup>4</sup> A  | -0.61 (0uuu0) +0.49 (00uuu)<br>-0.42 (uu0u0) +0.42 (u0u0u)                                | 23 611                                         | 3.12                                   | -0.0002                             | 0.0000  | 0.0000  |
| 6 <sup>4</sup> A  | 0.61 (0uu0u) +0.49 (0u0uu)<br>-0.42 (uu00u) -0.42 (u0uu0)                                 | 23 613                                         | 3.23                                   | 0.0000                              | -0.0002 | 0.0000  |
| 8 <sup>2</sup> A  | 0.61 (u0200) +0.61 (u2000)                                                                | 23 973                                         | 249.10                                 | 0.0000                              | 0.0000  | 1.2941  |
| 7 <sup>4</sup> A  | -0.60 (u0u0u) -0.60 (uu0u0)<br>+0.53 (u00uu)                                              | 24 890                                         | 0.11                                   | 0.0000                              | 0.0000  | 0.0000  |
| 9 <sup>2</sup> A  | 0.56 (002u0) +0.48 (ud00u)<br>+0.48 (u0du0) -0.43 (0ud0u)                                 | 31 421                                         | 5.16                                   | 0.0000                              | 0.0004  | 0.0000  |
| 10 <sup>2</sup> A | 0.59 (u0du0) -0.58 (ud00u)<br>+0.38 (0ud0u)                                               | 32 090                                         | 0.39                                   | 0.0000                              | 0.0000  | 0.0000  |
| 11 <sup>2</sup> A | -0.50 (200u0) +0.38 (002u0)<br>-0.34 (ud00u) -0.34 (u0du0)<br>-0.32 (0uu0d)               | 33 280                                         | 25.05                                  | 0.0008                              | 0.0087  | 0.0000  |
| 12 <sup>2</sup> A | -0.50 (2000u) +0.38 (0200u)<br>-0.34 (ud0u0) +0.34 (u0d0u)<br>+0.32 (0uud0)               | 33 597                                         | 24.42                                  | 0.0080                              | 0.0009  | 0.0000  |
| 13 <sup>2</sup> A | -0.58 (0uu0d) -0.43 (uu00d)<br>-0.43 (u0ud0)                                              | 34 247                                         | 178.66                                 | 0.0343                              | 0.4318  | 0.0000  |
| 14 <sup>2</sup> A | -0.58 (0uud0) +0.43 (uu0d0)<br>-0.43 (u0u0d)                                              | 34 266                                         | 178.79                                 | 0.4322                              | 0.0342  | 0.0000  |
| 15 <sup>2</sup> A | 0.63 (u0ud0) -0.63 (uu00d)                                                                | 34 283                                         | 196.56                                 | 0.0000                              | 0.0000  | 0.5635  |
| 16 <sup>2</sup> A | -0.56 (0200u) +0.48 (u0d0u)<br>-0.48 (ud0u0) +0.43 (0udu0)                                | 35 833                                         | 5.23                                   | 0.0004                              | 0.0000  | 0.0000  |
| 17 <sup>2</sup> A | -0.49 (0udu0) -0.37 (u0d0u)<br>-0.37 (ud0u0) +0.35 (0020u)<br>-0.32 (u0u0d) -0.31 (uu0d0) | 35 963                                         | 0.57                                   | 0.0000                              | 0.0000  | 0.0000  |
| 8 <sup>4</sup> A  | -0.85 (u00uu) -0.38 (uu0u0)                                                               | 38 957                                         | 0.04                                   | 0.0000                              | 0.0000  | 0.0000  |

|                   |                                                                             |        |       |        |        |        |  |
|-------------------|-----------------------------------------------------------------------------|--------|-------|--------|--------|--------|--|
|                   | −0.38 (u0u0u)                                                               |        |       |        |        |        |  |
| 18 <sup>2</sup> A | −0.59 (0uu0d) +0.43 (uu00d)<br>+0.43 (u0ud0)                                | 40 015 | 3.66  | 0.0000 | 0.0002 | 0.0000 |  |
| 19 <sup>2</sup> A | 0.59 (0uud0) +0.43 (uu0d0)<br>−0.42 (u0u0d)                                 | 40 255 | 3.77  | 0.0002 | 0.0000 | 0.0000 |  |
| 9 <sup>4</sup> A  | −0.86 (0u0uu) +0.36 (0uu0u)                                                 | 40 837 | 1.47  | 0.0000 | 0.0000 | 0.0000 |  |
| 10 <sup>4</sup> A | 0.86 (00uuu) +0.36 (0uuu0)                                                  | 40 924 | 1.44  | 0.0000 | 0.0000 | 0.0000 |  |
| 20 <sup>2</sup> A | 0.59 (u0u0d) +0.58 (uu0d0)                                                  | 41 181 | 0.12  | 0.0000 | 0.0000 | 0.0000 |  |
| 21 <sup>2</sup> A | 0.47 (0u002) −0.41 (2000u)<br>+0.35 (0020u)                                 | 48 064 | 14.48 | 0.0021 | 0.0000 | 0.0000 |  |
| 22 <sup>2</sup> A | −0.45 (00u20) −0.41 (200u0)<br>+0.33 (020u0)                                | 48 110 | 14.53 | 0.0000 | 0.0021 | 0.0000 |  |
| 23 <sup>2</sup> A | 0.36 (0ud0u) −0.34 (u0020)<br>+0.30 (020u0)                                 | 48 410 | 19.17 | 0.0000 | 0.0000 | 0.0038 |  |
| 24 <sup>2</sup> A | −0.54 (u0d0u) −0.54 (ud0u0)<br>+0.40 (0udu0)                                | 50 807 | 0.01  | 0.0000 | 0.0000 | 0.0000 |  |
| 25 <sup>2</sup> A | 0.74 (u00du) −0.43 (u00ud)                                                  | 52 331 | 0.05  | 0.0000 | 0.0000 | 0.0000 |  |
| 26 <sup>2</sup> A | −0.41 (00u20) +0.35 (0u0du)<br>+0.33 (200u0) −0.32 (u0020)<br>+0.32 (u0002) | 53 637 | 58.30 | 0.0005 | 0.0312 | 0.0000 |  |
| 27 <sup>2</sup> A | 0.61 (00udu) −0.55 (00uud)<br>−0.45 (u00ud)                                 | 53 939 | 11.52 | 0.0012 | 0.0000 | 0.0000 |  |
| 28 <sup>2</sup> A | −0.44 (00uud) +0.41 (0u002)<br>+0.40 (u00ud) +0.33 (2000u)                  | 53 978 | 58.30 | 0.0310 | 0.0005 | 0.0000 |  |
| 29 <sup>2</sup> A | −0.78 (0u0du) +0.37 (u0002)<br>−0.37 (u0020)                                | 54 045 | 11.54 | 0.0000 | 0.0012 | 0.0000 |  |
| 30 <sup>2</sup> A | −0.46 (0u0ud) −0.37 (00u20)<br>+0.37 (00u02) +0.32 (0ud0u)                  | 55 078 | 61.12 | 0.0000 | 0.0000 | 0.0339 |  |
| 31 <sup>2</sup> A | −0.67 (0002u) +0.51 (0020u)<br>+0.30 (2000u)                                | 59 204 | 5.68  | 0.0003 | 0.0000 | 0.0000 |  |
| 32 <sup>2</sup> A | 0.67 (000u2) +0.51 (020u0)<br>+0.30 (200u0)                                 | 59 497 | 5.63  | 0.0000 | 0.0003 | 0.0000 |  |
| 33 <sup>2</sup> A | −0.60 (00udu) −0.47 (00uud)<br>−0.43 (u00du)                                | 61 810 | 1.97  | 0.0000 | 0.0000 | 0.0000 |  |
| 34 <sup>2</sup> A | 0.49 (0u002) −0.48 (u00ud)<br>−0.44 (0u020) −0.32 (00udu)                   | 62 238 | 2.63  | 0.0001 | 0.0000 | 0.0000 |  |
| 35 <sup>2</sup> A | −0.57 (0u0ud) +0.36 (u0002)<br>−0.36 (u0020) +0.32 (00u20)                  | 62 252 | 3.27  | 0.0000 | 0.0001 | 0.0000 |  |
| 36 <sup>2</sup> A | −0.70 (0002u) −0.51 (0020u)<br>−0.35 (2000u)                                | 75 373 | 3.49  | 0.0001 | 0.0000 | 0.0000 |  |
| 37 <sup>2</sup> A | 0.70 (000u2) −0.41 (020u0)<br>−0.35 (200u0)                                 | 75 774 | 3.46  | 0.0000 | 0.0001 | 0.0000 |  |
| 38 <sup>2</sup> A | 0.73 (00u02) +0.44 (00u20)                                                  | 76 794 | 13.56 | 0.0000 | 0.0012 | 0.0000 |  |
| 39 <sup>2</sup> A | −0.73 (0u020) −0.44 (0u002)                                                 | 76 932 | 13.55 | 0.0012 | 0.0000 | 0.0000 |  |
| 40 <sup>2</sup> A | 0.60 (u0020) +0.60 (u0002)                                                  | 78 206 | 6.64  | 0.0000 | 0.0000 | 0.0003 |  |

<sup>a</sup> 2, 0, u, and d stand for the doubly occupied, unoccupied, spin up ( $\alpha$ ), and spin down ( $\beta$ ), respectively. <sup>b</sup> Spin–orbit coupling constants. <sup>c</sup> Contributions to the  $\mathbf{D}^{\text{SO}}$  principal values.

Table S3 Electronic states of Mn(acac)<sub>3</sub>.

| State             | Main Configurations ( $ C  > 0.3$ ) <sup>a</sup>           | $\Delta E_{\text{MRMP2}}$<br>/cm <sup>-1</sup> | SOCC <sup>b</sup><br>/cm <sup>-1</sup> | $D_{ii}^{\text{SO}}/ \text{cm}^{-1}$ |         |         |
|-------------------|------------------------------------------------------------|------------------------------------------------|----------------------------------------|--------------------------------------|---------|---------|
|                   |                                                            |                                                |                                        | $i = x$                              | $i = y$ | $i = z$ |
| 1 <sup>5</sup> A  | 1.00 (uuuu0)                                               |                                                |                                        |                                      |         |         |
| 2 <sup>5</sup> A  | -1.00 (uuu0u)                                              | 8 885                                          | 31.42                                  | 0.0000                               | -0.0125 | -0.0153 |
| 1 <sup>3</sup> A  | 0.95 (uu200)                                               | 10 742                                         | 45.86                                  | 0.0653                               | 0.0000  | 0.0000  |
| 2 <sup>3</sup> A  | 0.96 (2uu00)                                               | 10 772                                         | 274.98                                 | 2.3396                               | 0.0002  | 0.0000  |
| 3 <sup>3</sup> A  | 0.97 (u2u00)                                               | 11 388                                         | 282.82                                 | 0.0002                               | 2.3346  | 0.0064  |
| 4 <sup>3</sup> A  | 0.66 (u02u0) -0.53 (20uu0)<br>+0.34 (02uu0)                | 16 300                                         | 142.68                                 | 0.0000                               | 0.4087  | 0.0076  |
| 5 <sup>3</sup> A  | -0.85 (0u2u0) -0.33 (uudu0)<br>-0.30 (2u0u0)               | 17 809                                         | 164.66                                 | 0.5074                               | 0.0001  | 0.0000  |
| 3 <sup>5</sup> A  | -1.00 (uu0uu)                                              | 19 192                                         | 318.67                                 | 0.0000                               | -0.0080 | -1.3148 |
| 4 <sup>5</sup> A  | -1.00 (u0uuu)                                              | 20 819                                         | 160.65                                 | -0.3099                              | 0.0000  | 0.0000  |
| 6 <sup>3</sup> A  | 0.85 (u200u)                                               | 21 666                                         | 114.01                                 | 0.2000                               | 0.0000  | 0.0000  |
| 5 <sup>5</sup> A  | 1.00 (0uuuu)                                               | 21 696                                         | 166.75                                 | 0.0000                               | -0.2889 | -0.0315 |
| 7 <sup>3</sup> A  | 0.84 (uuud0) -0.46 (uudu0)                                 | 22 667                                         | 2.96                                   | 0.0001                               | 0.0000  | 0.0000  |
| 8 <sup>3</sup> A  | -0.64 (2u00u) +0.54 (udu0u)<br>+0.31 (02uu0)               | 22 919                                         | 146.84                                 | 0.0000                               | 0.1203  | 0.1932  |
| 9 <sup>3</sup> A  | 0.58 (u02u0) -0.47 (02uu0)<br>+0.41 (20uu0) +0.38 (uuu0d)  | 22 970                                         | 72.23                                  | 0.0000                               | 0.0753  | 0.0004  |
| 10 <sup>3</sup> A | -0.91 (uduu0)                                              | 23 172                                         | 34.98                                  | 0.0176                               | 0.0000  | 0.0000  |
| 11 <sup>3</sup> A | 0.59 (2u00u) +0.50 (udu0u)<br>+0.34 (20uu0) +0.31 (02uu0)  | 25 662                                         | 167.47                                 | 0.0000                               | 0.0235  | 0.3408  |
| 12 <sup>3</sup> A | -0.73 (uuud0) -0.44 (uuud0)                                | 26 955                                         | 13.60                                  | 0.0023                               | 0.0000  | 0.0000  |
| 13 <sup>3</sup> A | 0.78 (u0u20) +0.33 (0uuud)                                 | 30 168                                         | 348.02                                 | 0.0002                               | 1.3381  | 0.0000  |
| 14 <sup>3</sup> A | -0.57 (200uu) +0.38 (u0duu)<br>+0.36 (2u0u0) +0.35 (020uu) | 30 683                                         | 54.92                                  | 0.0328                               | 0.0000  | 0.0000  |
| 15 <sup>3</sup> A | 0.74 (0uu20) +0.40 (u0uud)                                 | 31 078                                         | 352.42                                 | 1.3319                               | 0.0002  | 0.0000  |
| 16 <sup>3</sup> A | 0.65 (uuu0d) +0.62 (uud0u)<br>+0.32 (02uu0)                | 31 472                                         | 18.58                                  | 0.0000                               | 0.0011  | 0.0026  |
| 17 <sup>3</sup> A | 0.59 (02u0u) -0.57 (20u0u)<br>+0.31 (uuud0)                | 33 986                                         | 9.45                                   | 0.0009                               | 0.0000  | 0.0000  |
| 18 <sup>3</sup> A | 0.52 (u0duu) -0.41 (020uu)<br>+0.32 (02u0u)                | 35 337                                         | 0.40                                   | 0.0000                               | 0.0000  | 0.0000  |
| 19 <sup>3</sup> A | -0.59 (0u0uu) -0.39 (u2u0u)<br>+0.33 (0uudu) -0.33 (uu0du) | 35 893                                         | 101.29                                 | 0.0000                               | 0.0003  | 0.0950  |
| 20 <sup>3</sup> A | -0.62 (uud0u) +0.58 (uuu0d)<br>-0.35 (ud0uu)               | 36 118                                         | 70.27                                  | 0.0000                               | 0.0103  | 0.0352  |
| 21 <sup>3</sup> A | -0.74 (uu0du) +0.33 (0u0uu)                                | 37 392                                         | 142.85                                 | 0.0000                               | 0.0334  | 0.1485  |
| 22 <sup>3</sup> A | 0.66 (0uuud) -0.60 (0uudu)                                 | 39 983                                         | 113.95                                 | 0.0000                               | 0.1080  | 0.0002  |
| 23 <sup>3</sup> A | 0.76 (uu002) -0.47 (uu020)                                 | 40 951                                         | 4.35                                   | 0.0002                               | 0.0000  | 0.0000  |
| 24 <sup>3</sup> A | 0.69 (u0uud) -0.59 (u0udu)                                 | 41 099                                         | 81.97                                  | 0.0545                               | 0.0000  | 0.0000  |
| 25 <sup>3</sup> A | 0.71 (002uu) -0.44 (020uu)                                 | 43 622                                         | 10.79                                  | 0.0009                               | 0.0000  | 0.0000  |
| 26 <sup>3</sup> A | 0.61 (u002u) -0.38 (u020u)<br>+0.37 (u0udu)                | 44 023                                         | 0.78                                   | 0.0000                               | 0.0000  | 0.0000  |
| 27 <sup>3</sup> A | -0.49 (0u02u) +0.40 (0uudu)                                | 44 071                                         | 50.38                                  | 0.0000                               | 0.0000  | 0.0192  |
| 28 <sup>3</sup> A | 0.53 (0u20u) -0.44 (0uuud)                                 | 44 864                                         | 51.88                                  | 0.0000                               | 0.0183  | 0.0017  |

|                   |                                                                             |        |        |        |        |        |
|-------------------|-----------------------------------------------------------------------------|--------|--------|--------|--------|--------|
|                   | +0.32 (u20u0)                                                               |        |        |        |        |        |
| 29 <sup>3</sup> A | 0.55 (udu0u) -0.39 (20uu0)<br>-0.33 (02uu0) +0.30 (00uu2)                   | 45 226 | 137.15 | 0.0000 | 0.0028 | 0.1358 |
| 30 <sup>3</sup> A | -0.64 (00u2u)                                                               | 45 363 | 35.71  | 0.0094 | 0.0000 | 0.0000 |
| 31 <sup>3</sup> A | 0.40 (u0uud) -0.40 (00u2u)<br>+0.37 (u0duu) +0.32 (u0udu)                   | 45 992 | 59.12  | 0.0253 | 0.0000 | 0.0000 |
| 32 <sup>3</sup> A | 0.80 (ud0uu) -0.31 (uud0u)                                                  | 46 075 | 36.55  | 0.0000 | 0.0013 | 0.0083 |
| 33 <sup>3</sup> A | 0.86 (uu0ud) +0.34 (uu0du)                                                  | 46 371 | 242.71 | 0.0000 | 0.0033 | 0.4202 |
| 34 <sup>3</sup> A | -0.58 (0u0u2) -0.40 (u002u)<br>-0.38 (u0duu)                                | 51 339 | 6.18   | 0.0002 | 0.0000 | 0.0000 |
| 35 <sup>3</sup> A | 0.60 (u00u2) -0.45 (0uduu)<br>+0.40 (0u02u)                                 | 52 198 | 26.85  | 0.0000 | 0.0000 | 0.0046 |
| 36 <sup>3</sup> A | -0.36 (uu020) -0.35 (0u0u2)<br>-0.34 (uu002) +0.34 (20u0u)<br>+0.32 (0uu02) | 62 014 | 7.20   | 0.0003 | 0.0000 | 0.0000 |
| 37 <sup>3</sup> A | -0.58 (uu020) -0.44 (uu002)<br>+0.37 (0u0u2)                                | 62 597 | 2.96   | 0.0000 | 0.0000 | 0.0000 |
| 38 <sup>3</sup> A | -0.58 (u00u2) +0.41 (u20u0)<br>-0.37 (0uduu) -0.34 (0u20u)                  | 64 037 | 5.30   | 0.0000 | 0.0001 | 0.0000 |
| 39 <sup>3</sup> A | -0.48 (00u2u) +0.38 (02u0u)<br>+0.36 (20u0u) +0.34 (uu020)<br>+0.32 (u020u) | 65 536 | 11.17  | 0.0006 | 0.0000 | 0.0000 |
| 40 <sup>3</sup> A | 0.53 (u002u) +0.43 (u020u)<br>-0.32 (u0udu)                                 | 65 695 | 33.81  | 0.0058 | 0.0000 | 0.0000 |
| 41 <sup>3</sup> A | 0.68 (0u02u) +0.45 (0u20u)<br>+0.33 (0uudu) -0.32 (u00u2)                   | 67 839 | 24.18  | 0.0000 | 0.0017 | 0.0001 |
| 42 <sup>3</sup> A | 0.56 (002uu) +0.51 (020uu)<br>+0.45 (200uu)                                 | 69 349 | 8.74   | 0.0004 | 0.0000 | 0.0000 |
| 43 <sup>3</sup> A | -0.59 (00uu2) -0.58 (u0u02)                                                 | 71 819 | 63.12  | 0.0000 | 0.0185 | 0.0000 |
| 44 <sup>3</sup> A | 0.65 (00uu2) -0.59 (u0u02)                                                  | 75 326 | 92.73  | 0.0380 | 0.0000 | 0.0000 |
| 45 <sup>3</sup> A | -0.74 (0uu02) -0.50 (0u0u2)                                                 | 76 205 | 74.47  | 0.0000 | 0.0243 | 0.0000 |

<sup>a</sup> 2, 0, u, and d stand for the doubly occupied, unoccupied, spin up ( $\alpha$ ), and spin down ( $\beta$ ), respectively. <sup>b</sup> Spin-orbit coupling constants. <sup>c</sup> Contributions to the  $\mathbf{D}^{\text{SO}}$  principal values.

Table S4 Electronic states of Fe(acac)<sub>3</sub>.

| State             | Main Configurations ( $ C  > 0.3$ ) <sup>a</sup>                            | $\Delta E_{\text{MRMP2}}$<br>/cm <sup>-1</sup> | SOCC <sup>b</sup><br>/cm <sup>-1</sup> | $D_{ii}^{\text{SO}}/ \text{cm}^{-1}$ |         |         |
|-------------------|-----------------------------------------------------------------------------|------------------------------------------------|----------------------------------------|--------------------------------------|---------|---------|
|                   |                                                                             |                                                |                                        | $i = x$                              | $i = y$ | $i = z$ |
| 1 <sup>6</sup> A  | 1.00 (uuuuu)                                                                |                                                |                                        |                                      |         |         |
| 1 <sup>4</sup> A  | 0.72 (2uu0u) +0.47 (uu2u0)<br>+0.46 (u2u0u)                                 | 18 714                                         | 377.00                                 | 1.8986                               | 0.0000  | 0.0000  |
| 2 <sup>4</sup> A  | -0.70 (2uuu0) +0.50 (u2uu0)<br>-0.46 (uu20u)                                | 18 762                                         | 376.41                                 | 0.0000                               | 1.8877  | 0.0002  |
| 3 <sup>4</sup> A  | 0.70 (uu20u) +0.69 (u2uu0)                                                  | 22 005                                         | 384.13                                 | 0.0000                               | 0.0002  | 1.6762  |
| 4 <sup>4</sup> A  | -0.56 (2uuu0) +0.43 (uu20u)<br>-0.42 (u2uu0)                                | 23 898                                         | 11.80                                  | 0.0000                               | 0.0014  | 0.0000  |
| 5 <sup>4</sup> A  | 0.54 (2uu0u) -0.45 (uu2u0)<br>-0.43 (u2u0u) -0.32 (uuduu)                   | 24 055                                         | 11.23                                  | 0.0013                               | 0.0000  | 0.0000  |
| 6 <sup>4</sup> A  | 0.57 (u2u0u) -0.55 (uu2u0)<br>-0.44 (uduuu)                                 | 26 067                                         | 0.05                                   | 0.0000                               | 0.0000  | 0.0000  |
| 7 <sup>4</sup> A  | -0.78 (uuudu) +0.60 (uuuud)                                                 | 33 022                                         | 0.08                                   | 0.0000                               | 0.0000  | 0.0000  |
| 8 <sup>4</sup> A  | 0.49 (uuu20) -0.49 (uuu02)<br>+0.45 (2u0uu) +0.41 (0u2uu)                   | 33 126                                         | 6.59                                   | 0.0000                               | 0.0003  | 0.0000  |
| 9 <sup>4</sup> A  | -0.55 (uuuud) -0.43 (20uuu)<br>-0.43 (uuudu) -0.39 (02uuu)<br>-0.35 (uuduu) | 33 141                                         | 5.89                                   | 0.0003                               | 0.0000  | 0.0000  |
| 10 <sup>4</sup> A | -0.73 (uduuu) +0.42 (uuduu)<br>+0.37 (uu2u0) -0.36 (u2u0u)                  | 36 265                                         | 2.33                                   | 0.0000                               | 0.0000  | 0.0000  |
| 11 <sup>4</sup> A | -0.49 (u20uu) +0.49 (u02uu)<br>+0.41 (2u0uu) +0.35 (2uuu0)<br>+0.35 (0u2uu) | 36 331                                         | 12.57                                  | 0.0000                               | 0.0011  | 0.0000  |
| 12 <sup>4</sup> A | -0.59 (uuduu) -0.43 (20uuu)<br>+0.37 (02uuu) -0.34 (2uu0u)<br>-0.30 (uduuu) | 36 382                                         | 13.32                                  | 0.0012                               | 0.0000  | 0.0000  |
| 13 <sup>4</sup> A | -0.50 (uuu20) +0.50 (uuu02)<br>+0.43 (2u0uu) -0.34 (u02uu)<br>+0.33 (u20uu) | 39 624                                         | 71.53                                  | 0.0000                               | 0.0323  | 0.0000  |
| 14 <sup>4</sup> A | -0.56 (uuuud) -0.43 (uuudu)<br>+0.41 (uuduu) -0.41 (20uuu)                  | 39 690                                         | 70.50                                  | 0.0313                               | 0.0000  | 0.0000  |
| 15 <sup>4</sup> A | -0.54 (0uu2u) +0.49 (02uuu)<br>+0.42 (uu0u2) +0.40 (u0u2u)<br>+0.34 (20uuu) | 42 892                                         | 508.99                                 | 1.5100                               | 0.0000  | 0.0000  |
| 16 <sup>4</sup> A | 0.52 (0uuu2) -0.49 (0u2uu)<br>-0.44 (uu02u) +0.40 (u0uu2)<br>+0.34 (2u0uu)  | 44 194                                         | 509.25                                 | 0.0000                               | 1.4641  | 0.0029  |
| 17 <sup>4</sup> A | 0.63 (u0uu2) +0.59 (uu02u)<br>+0.34 (u02uu) +0.34 (u20uu)                   | 46 922                                         | 508.82                                 | 0.0000                               | 0.0028  | 1.3767  |
| 18 <sup>4</sup> A | -0.70 (uuu02) -0.70 (uuu20)                                                 | 50 908                                         | 16.60                                  | 0.0000                               | 0.0000  | 0.0014  |
| 19 <sup>4</sup> A | 0.61 (u02uu) +0.61 (u20uu)<br>-0.34 (uu02u) -0.33 (u0uu2)                   | 54 981                                         | 65.72                                  | 0.0000                               | 0.0000  | 0.0196  |
| 20 <sup>4</sup> A | -0.58 (02uuu) -0.53 (20uuu)<br>-0.34 (0uu2u) +0.34 (uu0u2)<br>+0.33 (u0u2u) | 55 371                                         | 73.57                                  | 0.0244                               | 0.0000  | 0.0000  |

|                   |                                                                             |        |       |        |        |        |
|-------------------|-----------------------------------------------------------------------------|--------|-------|--------|--------|--------|
| 21 <sup>4</sup> A | -0.57 (0u2uu) +0.53 (2u0uu)<br>-0.35 (u0uu2) +0.34 (uu02u)<br>-0.33 (0uuu2) | 55 835 | 73.09 | 0.0000 | 0.0239 | 0.0000 |
| 22 <sup>4</sup> A | 0.74 (0uuu2) +0.42 (uu02u)<br>-0.40 (u0uu2)                                 | 59 131 | 19.50 | 0.0000 | 0.0016 | 0.0000 |
| 23 <sup>4</sup> A | 0.72 (0uu2u) +0.44 (uu0u2)<br>+0.42 (u0u2u)                                 | 59 381 | 19.46 | 0.0016 | 0.0000 | 0.0000 |
| 24 <sup>4</sup> A | 0.68 (u0u2u) -0.65 (uu0u2)                                                  | 60 340 | 0.22  | 0.0000 | 0.0000 | 0.0000 |

<sup>a</sup> 2, 0, u, and d stand for the doubly occupied, unoccupied, spin up ( $\alpha$ ), and spin down ( $\beta$ ), respectively. <sup>b</sup> Spin-orbit coupling constants. <sup>c</sup> Contributions to the  $\mathbf{D}^{\text{SO}}$  principal values.



Table S5 Electronic states of Mo(acac)<sub>3</sub>.

| State             | Main Configurations ( $ C  > 0.3$ ) <sup>a</sup>                            | $\Delta E_{\text{MRMP2}}$<br>/cm <sup>-1</sup> | SOCC <sup>b</sup><br>/cm <sup>-1</sup> | $D_{ii}^{\text{SO}}/ \text{cm}^{-1}$ |         |         |
|-------------------|-----------------------------------------------------------------------------|------------------------------------------------|----------------------------------------|--------------------------------------|---------|---------|
|                   |                                                                             |                                                |                                        | $i = x$                              | $i = y$ | $i = z$ |
| 1 <sup>4</sup> A  | -1.00 (uuu00)                                                               |                                                |                                        |                                      |         |         |
| 1 <sup>2</sup> A  | 0.65 (20u00) -0.51 (02u00)                                                  | 12 094                                         | 74.80                                  | 0.0131                               | 0.2182  | 0.0000  |
| 2 <sup>2</sup> A  | 0.65 (2u000) +0.51 (0u200)<br>+0.33 (uud00)                                 | 12 156                                         | 75.17                                  | 0.2192                               | 0.0133  | 0.0000  |
| 3 <sup>2</sup> A  | -0.87 (udu00) +0.49 (uud00)                                                 | 12 960                                         | 0.50                                   | 0.0000                               | 0.0000  | 0.0000  |
| 4 <sup>2</sup> A  | -0.77 (uud00) -0.44 (udu00)                                                 | 13 448                                         | 38.52                                  | 0.0506                               | 0.0045  | 0.0000  |
| 5 <sup>2</sup> A  | 0.63 (u2000) -0.63 (u0200)                                                  | 13 477                                         | 38.50                                  | 0.0044                               | 0.0506  | 0.0000  |
| 6 <sup>2</sup> A  | -0.71 (02u00) -0.54 (20u00)                                                 | 17 702                                         | 663.82                                 | 8.6577                               | 3.7886  | 0.0001  |
| 7 <sup>2</sup> A  | -0.71 (0u200) +0.54 (2u000)                                                 | 17 709                                         | 663.57                                 | 3.7845                               | 8.6473  | 0.0001  |
| 8 <sup>2</sup> A  | 0.68 (u0200) +0.68 (u2000)                                                  | 19 270                                         | 532.78                                 | 0.0000                               | 0.0001  | 7.3652  |
| 2 <sup>4</sup> A  | 0.68 (uu0u0) -0.67 (u0u0u)                                                  | 25 297                                         | 746.57                                 | -0.0001                              | -0.0010 | -9.7912 |
| 3 <sup>4</sup> A  | 0.64 (0uuu0) +0.54 (u0u0u)<br>+0.52 (uu0u0)                                 | 25 984                                         | 699.14                                 | -0.3765                              | -7.9830 | -0.0013 |
| 4 <sup>4</sup> A  | -0.63 (0uu0u) -0.53 (u0uu0)<br>+0.53 (uu00u)                                | 26 021                                         | 699.01                                 | -7.9693                              | -0.3763 | 0.0000  |
| 5 <sup>4</sup> A  | -0.75 (0uuu0) +0.42 (u0u0u)<br>+0.42 (uu0u0)                                | 32 172                                         | 50.12                                  | -0.0025                              | -0.0322 | 0.0000  |
| 6 <sup>4</sup> A  | 0.67 (uu00u) +0.65 (u0uu0)                                                  | 32 179                                         | 0.29                                   | 0.0000                               | 0.0000  | 0.0000  |
| 7 <sup>4</sup> A  | 0.76 (0uu0u) -0.44 (u0uu0)<br>+0.41 (uu00u)                                 | 32 254                                         | 51.52                                  | -0.0339                              | -0.0026 | 0.0000  |
| 9 <sup>2</sup> A  | -0.65 (200u0) +0.35 (u0du0)<br>-0.34 (ud00u) -0.32 (u0ud0)<br>+0.31 (uu00d) | 35 022                                         | 229.18                                 | 0.6991                               | 0.0507  | 0.0001  |
| 10 <sup>2</sup> A | -0.64 (2000u) +0.43 (u0u0d)<br>-0.35 (u0d0u) -0.33 (ud0u0)                  | 35 582                                         | 254.98                                 | 0.0476                               | 0.6689  | 0.1971  |
| 11 <sup>2</sup> A | 0.59 (ud0u0) -0.59 (u0d0u)                                                  | 36 426                                         | 53.30                                  | 0.0000                               | 0.0000  | 0.0390  |
| 12 <sup>2</sup> A | 0.69 (uu0d0) -0.57 (u0u0d)                                                  | 37 758                                         | 634.25                                 | 0.0016                               | 0.0243  | 5.3011  |
| 13 <sup>2</sup> A | 0.64 (0uu0d) +0.40 (u0ud0)<br>-0.39 (uu00d)                                 | 38 722                                         | 539.37                                 | 3.5637                               | 0.1929  | 0.0000  |
| 14 <sup>2</sup> A | -0.64 (0uu0d) -0.40 (u0u0d)<br>-0.39 (uu0d0)                                | 38 743                                         | 539.21                                 | 0.1930                               | 3.5592  | 0.0001  |
| 15 <sup>2</sup> A | 0.59 (0020u) -0.42 (0udu0)<br>+0.35 (u0d0u) +0.35 (ud0u0)                   | 39 065                                         | 47.48                                  | 0.0045                               | 0.0243  | 0.0000  |
| 16 <sup>2</sup> A | -0.39 (ud00u) -0.39 (0ud0u)<br>-0.37 (u0du0) -0.33 (uu00d)<br>-0.32 (u0ud0) | 39 381                                         | 10.29                                  | 0.0011                               | 0.0002  | 0.0000  |
| 17 <sup>2</sup> A | 0.59 (020u0) -0.42 (0ud0u)<br>-0.35 (u0du0) +0.35 (ud00u)                   | 39 773                                         | 48.86                                  | 0.0255                               | 0.0045  | 0.0000  |
| 18 <sup>2</sup> A | -0.61 (u0ud0) -0.55 (uu00d)                                                 | 42 517                                         | 1.81                                   | 0.0000                               | 0.0000  | 0.0000  |
| 19 <sup>2</sup> A | -0.66 (0uu0d) -0.46 (uu00d)<br>+0.37 (u0ud0)                                | 42 742                                         | 15.57                                  | 0.0026                               | 0.0002  | 0.0000  |
| 20 <sup>2</sup> A | -0.65 (0uu0d) +0.42 (u0u0d)<br>+0.42 (uu0d0)                                | 42 801                                         | 14.39                                  | 0.0002                               | 0.0022  | 0.0000  |
| 21 <sup>2</sup> A | -0.54 (2000u) +0.40 (0200u)<br>+0.37 (0udu0)                                | 45 202                                         | 59.12                                  | 0.0074                               | 0.0312  | 0.0000  |

|                   |                                                                                           |        |       |         |         |        |
|-------------------|-------------------------------------------------------------------------------------------|--------|-------|---------|---------|--------|
| 22 <sup>2</sup> A | -0.54 (200u0) +0.40 (002u0)<br>+0.36 (0ud0u)                                              | 45 238 | 59.62 | 0.0318  | 0.0075  | 0.0000 |
| 23 <sup>2</sup> A | -0.46 (0udu0) -0.34 (0ud0u)<br>+0.34 (0200u) -0.33 (0020u)<br>+0.32 (u0d0u) -0.30 (ud0u0) | 46 493 | 59.48 | 0.0000  | 0.0000  | 0.0380 |
| 24 <sup>2</sup> A | 0.52 (ud00u) +0.52 (u0du0)<br>-0.36 (0ud0u)                                               | 47 825 | 0.01  | 0.0000  | 0.0000  | 0.0000 |
| 25 <sup>2</sup> A | -0.67 (002u0) -0.46 (020u0)<br>-0.39 (200u0)                                              | 54 417 | 0.85  | 0.0000  | 0.0000  | 0.0000 |
| 8 <sup>4</sup> A  | 0.98 (u00uu)                                                                              | 54 447 | 0.04  | 0.0000  | 0.0000  | 0.0000 |
| 26 <sup>2</sup> A | -0.67 (0200u) -0.46 (0020u)<br>-0.39 (2000u)                                              | 55 288 | 0.84  | 0.0000  | 0.0000  | 0.0000 |
| 9 <sup>4</sup> A  | 0.95 (00uuu)                                                                              | 58 098 | 5.14  | -0.0001 | -0.0001 | 0.0000 |
| 10 <sup>4</sup> A | -0.95 (0u0uu)                                                                             | 58 098 | 5.09  | -0.0001 | -0.0001 | 0.0000 |
| 27 <sup>2</sup> A | 0.81 (u00du) -0.47 (u00ud)                                                                | 65 292 | 0.10  | 0.0000  | 0.0000  | 0.0000 |
| 28 <sup>2</sup> A | -0.62 (u00ud) -0.53 (00udu)<br>-0.36 (u00du) +0.31 (00uud)                                | 66 076 | 35.21 | 0.0065  | 0.0029  | 0.0000 |
| 29 <sup>2</sup> A | -0.53 (0u0du) -0.51 (u0020)<br>+0.51 (u0002) +0.30 (0u0ud)                                | 66 077 | 35.01 | 0.0029  | 0.0064  | 0.0000 |
| 30 <sup>2</sup> A | 0.67 (0u0ud) -0.52 (00u02)                                                                | 67 520 | 53.62 | 0.0010  | 0.0203  | 0.0000 |
| 31 <sup>2</sup> A | -0.50 (0u0ud) -0.43 (00u02)<br>+0.42 (00u20) -0.33 (u0002)<br>-0.31 (u0020)               | 67 531 | 69.98 | 0.0000  | 0.0000  | 0.0363 |
| 32 <sup>2</sup> A | 0.68 (00udu) -0.53 (0u020)<br>-0.31 (u00ud)                                               | 67 720 | 53.56 | 0.0202  | 0.0010  | 0.0000 |
| 33 <sup>2</sup> A | -0.64 (00uud) -0.41 (0u020)<br>-0.41 (u00ud)                                              | 71 226 | 15.44 | 0.0016  | 0.0001  | 0.0000 |
| 34 <sup>2</sup> A | -0.66 (0u0du) +0.40 (00u02)<br>+0.33 (u0020) -0.33 (u0002)                                | 71 331 | 15.54 | 0.0001  | 0.0016  | 0.0000 |
| 35 <sup>2</sup> A | -0.55 (00uud) -0.43 (0u002)<br>+0.43 (0u020) +0.31 (00udu)                                | 71 565 | 0.33  | 0.0000  | 0.0000  | 0.0000 |
| 36 <sup>2</sup> A | 0.62 (u0020) +0.61 (u0002)                                                                | 79 968 | 17.33 | 0.0000  | 0.0000  | 0.0019 |
| 37 <sup>2</sup> A | -0.73 (00u20) -0.43 (00u02)                                                               | 81 739 | 6.41  | 0.0000  | 0.0002  | 0.0000 |
| 38 <sup>2</sup> A | -0.74 (0u002) -0.43 (0u020)                                                               | 81 760 | 6.37  | 0.0002  | 0.0000  | 0.0000 |
| 39 <sup>2</sup> A | -0.97 (0002u)                                                                             | 98 523 | 0.90  | 0.0000  | 0.0000  | 0.0000 |
| 40 <sup>2</sup> A | 0.97 (000u2)                                                                              | 98 559 | 0.89  | 0.0000  | 0.0000  | 0.0000 |

<sup>a</sup> 2, 0, u, and d stand for the doubly occupied, unoccupied, spin up ( $\alpha$ ), and spin down ( $\beta$ ), respectively. <sup>b</sup> Spin-orbit coupling constants. <sup>c</sup> Contributions to the  $\mathbf{D}^{\text{SO}}$  principal values.

#### 4. Spin configuration-based analysis of the $\mathbf{D}^{\text{SO}}$ (NOB-PK) tensors

In the present study, we adopted the orbital region partitioning technique (ORPT) for the analysis of the  $\mathbf{D}^{\text{SO}}$ (NOB-PK) tensors. As discussed in the text, the ORPT-based decomposition of the  $\mathbf{D}^{\text{SO}}$  tensor allows us to discuss relationships between excited configurations and  $\mathbf{D}^{\text{SO}}$  tensors, in a similar way to the ab initio methods utilising the sum-over-states equation like the hybrid CASSCF/MRMP2 method.

Traditionally, analyses of the DFT-based  $\mathbf{D}^{\text{SO}}$  tensors have been carried out by means of the spin configuration basis. Namely, theoretical  $\mathbf{D}^{\text{SO}}$  tensors are decomposed into four types of spin configurations:  $(\alpha \rightarrow \alpha)$ ,  $(\alpha \rightarrow \beta)$ ,  $(\beta \rightarrow \alpha)$  and  $(\beta \rightarrow \beta)$ . However, the  $\mathbf{D}^{\text{SO}}$  tensor analysis based on the spin configurations is not always useful, because a large amount of the  $\mathbf{D}^{\text{SO}}$  contributions is cancelled out among different spin configurations. For example, let us think about the  $\mathbf{D}^{\text{SO}}$  contributions from the (SOMO  $\rightarrow$  unoccupied orbital) excitations. Because SOMO is occupied by a spin- $\alpha$  electron, the (SOMO  $\rightarrow$  unoccupied orbital) excitations contribute to  $(\alpha \rightarrow \alpha)$  and  $(\alpha \rightarrow \beta)$  terms in the spin configuration-based  $\mathbf{D}^{\text{SO}}$  tensor decomposition. However, if the unoccupied orbital has the same spatial distributions and orbital energies between spin- $\alpha$  and  $\beta$ , the  $\mathbf{D}^{\text{SO}}(\alpha \rightarrow \alpha)$  and  $\mathbf{D}^{\text{SO}}(\alpha \rightarrow \beta)$  have the same absolute value with different sign, and therefore the  $\mathbf{D}^{\text{SO}}$  contributions from such (SOMO  $\rightarrow$  unoccupied orbital) excitations are completely cancelled out, although both the  $\mathbf{D}^{\text{SO}}(\alpha \rightarrow \alpha)$  and the  $\mathbf{D}^{\text{SO}}(\alpha \rightarrow \beta)$  are nonzero. Similar cancellations also occur in the (DOR  $\rightarrow$  UOR) and (DOR  $\rightarrow$  SOR) excitations. Detailed discussions of the spin configuration and ORPT-based  $\mathbf{D}^{\text{SO}}$  decompositions are also given in Refs. S1 and S2.

The decomposed  $D^{\text{SO}}$ (NOB-PK) contributions of the  $\text{M}(\text{acac})_3$  complexes based on the spin configurations are given in Table S6.

Table S6 Decomposed  $D^{\text{SO}}$ (NOB-PK) contributions based on spin configurations

| Molecule                   | $D^{\text{SO}}$ (NOB-PK)    |                            |                            |                           |
|----------------------------|-----------------------------|----------------------------|----------------------------|---------------------------|
|                            | $\alpha \rightarrow \alpha$ | $\alpha \rightarrow \beta$ | $\beta \rightarrow \alpha$ | $\beta \rightarrow \beta$ |
| $\text{V}(\text{acac})_3$  | 1.8093                      | 0.3961                     | -0.1281                    | 0.1391                    |
| $\text{Cr}(\text{acac})_3$ | -0.1207                     | -0.2520                    | -0.0043                    | -0.0012                   |
| $\text{Mn}(\text{acac})_3$ | -0.6234                     | -1.6281                    | 0.0448                     | -0.0734                   |
| $\text{Fe}(\text{acac})_3$ | -0.1154                     | 0.0106                     | 0.1320                     | -0.1301                   |
| $\text{Mo}(\text{acac})_3$ | -2.2283                     | -3.8768                    | 1.3936                     | -1.3738                   |

As discussed in Table 7 and in the text, the ORPT-based analysis revealed that a large amount of the  $D^{\text{SO}}$  contributions arises from the (SOR  $\rightarrow$  SOR) excitations. The (SOR  $\rightarrow$  SOR) excitations contribute to the  $(\alpha \rightarrow \beta)$  term in the spin configuration-based decomposition. By contrast, from Table S6, the  $(\alpha \rightarrow \beta)$  term is not always the largest component. The most significant case is  $\text{Fe}(\text{acac})_3$ , where the  $D^{\text{SO}}$  contribution from the  $(\alpha \rightarrow \beta)$  spin configuration is the smallest, although all the valence  $d \rightarrow d$  excitations are attributed to the  $(\alpha \rightarrow \beta)$  transition. In the spin configuration-based analysis, the  $(\beta \rightarrow \alpha)$  excitations have the largest contributions to the  $D^{\text{SO}}$  value, which

contradicts Chemist's intuition. Looking into more details, except in  $\text{Cr}(\text{acac})_3$ , the  $D^{\text{SO}}$  contributions from the  $(\beta \rightarrow \alpha)$  and  $(\beta \rightarrow \beta)$  spin configurations are similar in magnitude but different in the absolute sign, and therefore most of the  $D^{\text{SO}}$  contributions from the  $(\beta \rightarrow \alpha)$  and  $(\beta \rightarrow \beta)$  excitations are cancelled out. This result is consistent with the fact that the  $(\text{DOR} \rightarrow \text{SOR})$  and  $(\text{DOR} \rightarrow \text{UOR})$  excitations are less important for the  $D^{\text{SO}}$  value. In conclusion, we highly recommend to use the ORPT-based  $\mathbf{D}^{\text{SO}}$  tensor decomposition for the analysis of the DFT-based  $\mathbf{D}^{\text{SO}}$  tensor calculations, instead of the traditional spin configuration-based decomposition.

### References in the ESI

- [S1] K. Sugisaki, K. Toyota, K. Sato, D. Shiomi, M. Kitagawa and T. Takui, An ab initio MO study of heavy atom effects on the zero-field splitting tensors of high-spin nitrenes: How the spin-orbit contributions are affected. *Phys. Chem. Chem. Phys.*, 2014, **16**, 9171–9181.
- [S2] K. Sugisaki, K. Toyota, K. Sato, D. Shiomi and T. Takui, Quasi-restricted orbital treatment for the density functional theory calculations of the spin-orbit term of zero-field splitting tensors. *J. Phys. Chem. A*, 2016, **120**, 9857–9866.
